1 **Changes in emergency department utilization in vulnerable populations after COVID-19**  
2 **shelter in place orders**

3  
4 Philip R. Wang BS<sup>1</sup>, Akhil Anand MD<sup>1,2</sup>, James Bena MS<sup>3</sup>, Shannon Morrison MS<sup>3</sup>, and Jeremy  
5 Weleff DO<sup>4</sup>  
6

- 7 1. Cleveland Clinic Lerner College of Medicine at Case Western Reserve University, EC-10  
8 Cleveland Clinic, Cleveland, OH, USA  
9 2. Department of Psychiatry and Psychology, Center for Behavioral Health, Neurological  
10 Institute, Cleveland Clinic, Cleveland, OH, USA  
11 3. Department of Quantitative Health Sciences, Cleveland Clinic, Cleveland, Ohio  
12 4. Department of Psychiatry, Yale University School of Medicine, New Haven, Connecticut,  
13 USA  
14

15  
16 **Corresponding author:**

17 Jeremy Weleff, DO  
18 Yale University School of Medicine, Department of Psychiatry  
19 300 George St, New Haven, CT, 06511  
20 Phone/fax: 517-803-5675  
21 [jeremy.weleff@yale.edu](mailto:jeremy.weleff@yale.edu)  
22

23 **Short title:** COVID-19's effect on patients with MH/SUD/SDOH

24 **Keywords:** social determinants of health, mental health, substance use disorders, emergency  
25 department utilization, Z-codes

26 Word Count: 1462

27 Prior presentations: none

28 **Funding sources/disclosures:** This research did not receive any specific grant from funding  
29 agencies in the public, commercial, or not-for-profit sectors. All authors have no conflicts of  
30 interest, financial or otherwise, to declare related to this manuscript.

31 **Credit author statement:** Concept and design: PW, AA, JW. Acquisition of the data: JB, SM,  
32 AA, JW. Analysis and interpretation of the data: PW, AA, JB, SM, JW. Drafting of the  
33 manuscript: PW. Critical revision of the manuscript for important intellectual content: AA, JW,  
34 JB, SM. Statistical expertise: JB, SM, JW. Acquisition of funding: None

35

36

37 **Abstract:**

38 **Purpose:** To compare emergency department (ED) utilization and admission rates for patients  
39 with a history of mental health (MH), substance use disorder (SUD) and social determinants of  
40 health (SDOH) before and after implementing COVID-19's shelter-in-place (SIP) orders.

41 **Methods:** This was a retrospective, multicenter study leveraging electronic medical record data  
42 from 20 EDs across a large Midwest integrated healthcare system from 5/2/2019 to 12/31/2019  
43 (pre-SIP) and from 5/2/2020 to 12/31/2020 (post-SIP). Diagnoses were documented in the  
44 patient's medical records. Poisson and logistic regression models were used to evaluate ED  
45 utilization and admission rate changes.

46 **Results:** 871,020 total ED encounters from 487,028 unique patients were captured. 2,572  
47 (0.53%) patients had a documented Z code for SDOH. Patients with previously diagnosed MH or  
48 SUDs were more likely to seek ED care after the SIP orders were implemented (RR: 1.20, 95%  
49 CI: 1.18 – 1.22,  $p < 0.001$ ), as were patients with SDOH (RR: 2.37, 95% CI: 2.19 – 2.55,  
50  $p < 0.001$ ). Patients with both previously diagnosed MH or SUD and a documented SDOH had  
51 even higher ED utilization (RR: 3.31, 95% CI: 2.83 – 3.88,  $p < 0.001$ ) than those with either  
52 condition alone. Patients with MH and SUDs (OR: 0.89, 95% CI: 0.86 – 0.92,  $p < 0.001$ ) or  
53 SDOH (OR: 0.67, 95% CI: 0.54, 0.83,  $p < 0.001$ ) were less likely to be admitted post-SIP orders  
54 while patients with a history of diseases of physiologic systems were more likely to be admitted.

55 **Conclusions:** Vulnerable populations with a history of MH, SUD, and SDOH experienced  
56 increased ED utilization but a lower rate of hospital admissions after the implementation of SIP  
57 orders. The findings highlight the importance of addressing these needs to mitigate the impact of  
58 public health crises on these populations.

59

60 **Keywords:** social determinants of health, mental health, substance use disorders, emergency  
61 department utilization, Z-codes

62 **Abbreviations:**

- 63 • Mental health – MH
- 64 • Substance use disorder - SUD
- 65 • Social determinant of health – SDOH
- 66 • Emergency department – ED
- 67 • Shelter in place – SIP

68

69 **Word Count (not including abstract):** 1496

70 **No. of text pages:** 4

71 **No. of figures/tables:** 2

72

## 73 **Background**

74 Patients with mental health (MH) and substance use disorders (SUD) face significant challenges  
75 in accessing healthcare equitably.<sup>1</sup> In addition, social determinants of health (SDOH) profoundly  
76 impact healthcare utilization, delivery, quality of life, and mortality. Identifying these patients for  
77 targeted interventions is crucial<sup>2</sup>; however, inconsistent and non-standardized documentation of  
78 SDOH across healthcare systems hinders public health surveillance efforts of this population. To  
79 address this issue, the Centers for Medicare and Medicaid Services and other groups have  
80 proposed using Z-Codes to standardize the documentation of social needs, but the utilization of  
81 these codes remains limited.<sup>3,4</sup>

82 The COVID-19 pandemic has exacerbated health disparities and disproportionately affected  
83 individuals with MH, SUD, and SDOH.<sup>5</sup> While research has shown that shelter-in-place (SIP)  
84 orders have led to increased ED visits for mental health and substance use reasons<sup>6-8</sup>, few studies  
85 have examined the impact on ED utilization and admissions in individuals with a prior history of  
86 MH or SUD. Furthermore, the effects of the COVID-19 pandemic on ED utilization and  
87 admissions by patients with SDOH have had been poorly studied thus far. The primary aim of  
88 this study is to investigate the changes in ED utilization and hospital admission rates among  
89 vulnerable populations with a history of MH, SUD, and SDOH before and after SIP orders  
90 across a large integrated healthcare system. A secondary aim was to characterize the frequency  
91 of utilization of Z-codes to identify patients with SDOH in the ED.

## 93 **Methods**

### 94 *Patient population*

95 Patients who visited any of 20 EDs ranging from large hospital-associated EDs to freestanding  
96 EDs across a large Midwest integrated healthcare system Ohio from 5/2/2019-12/31/2019  
97 (designated as the “pre-SIP order” time period) and 5/2/2020-12/31/2020 (the “post-SIP order”  
98 time period) were identified. Demographics and diagnoses were extracted from the electronic  
99 medical record (EMR). MH and SUDs were identified using the International Classification of  
100 Diseases 10th Revision (ICD-10) codes; similarly, SDOH were identified in patients’ medical  
101 histories using respective Z-Codes in the ICD-10. Historical use of these codes means that these  
102 diagnoses and SDOH were documented in the patient's chart at any time, and not solely reliant  
103 on ED encounter documentation. This study was approved by Cleveland Clinic IRB.

### 104 *Statistical analysis*

105  
106 Poisson regression models were used to calculate absolute risk ratios (RR) to compare the total  
107 number of cases between the pre-and post-SIP periods. Logistic regression models were used to  
108 evaluate changes in admission rates between the two periods, and odds ratios (OR) were  
109 calculated.

## 111 **Results**

### 112 *Patient demographics*

113 871,020 total ED encounters from 487,028 unique patients were captured; 473,449 visits (54%)  
114 occurred in 2019, and 397,571 (46%) were in 2020. Our cohort was mostly White (65.4%),  
115 female (53.8%), privately insured (68.9%), and had a mean age of  $46.0 \pm 24.0$ . 2,572 (0.53%)  
116 patients had a documented Z code for SDOH. The most coded SDOH in ED encounters was  
117 problems related to housing and economic circumstances, followed by other problems related to  
118 the primary support group and other psychosocial circumstances (Supplemental Table 1).  
119 Compared to patients without SDOH, patients with a coded SDOH were more likely to be Black,  
120 younger, identify as male, and were more likely to be on government or self-pay insurance  
121 (Supplemental Table 2).

#### 122 *ED utilization rates before and after shelter-in-place orders*

123 Compared to before the implementation of SIP orders, patients with previously diagnosed MH or  
124 SUDs were more likely to seek ED care after the SIP orders were put in place (RR: 1.20, 95%  
125 CI: 1.18 – 1.22,  $p < 0.001$ ) (Table 1). Among patients with SDOH, those with a history of  
126 problems related to the primary support group (RR: 2.89, 95% CI: 2.54 – 3.29) or housing and  
127 economic circumstances (RR: 2.50, 95% CI: 2.23 – 2.80) were more likely to present to the ED  
128 after SIP orders. Patients with both previously diagnosed MH or SUD and a documented SDOH  
129 (RR: 3.31, 95% CI: 2.83 – 3.88,  $p < 0.001$ ) had even higher ED utilization than those with either  
130 condition alone.

#### 131 *ED admission rates before and after shelter-in-place orders*

132 Compared to pre-SIP, patients with a previously diagnosed MH or SUD (OR: 0.89, 95% CI: 0.86  
133 – 0.92,  $p < 0.001$ ) or any documented SDOH (OR: 0.67, 95% CI: 0.54, 0.83,  $p < 0.001$ ) were less  
134 likely to be admitted to the hospital after presenting to the ED post-SIP orders (Table 2). Of the  
135 SDOH diagnosis categories, only patients with problems related to their primary support group  
136 and those with problems related to other psychosocial circumstances were significantly less  
137 likely to be admitted. The difference in admission rate pre- and post-SIP orders in patients with  
138 both MH/SUD and SDOH did not reach significance (OR: 0.65, 95% CI: 0.42, 1.02,  $p = 0.061$ ).

## 139 **4. Discussion**

### 140 *The effect of shelter-in-place orders on vulnerable patient populations*

141 The COVID-19 pandemic has underscored the importance of addressing social determinants of  
142 health, which are critical in shaping an individual's health status and access to care. Our analysis  
143 of ED presentation and admission rates pre- and post-SIP orders found that patients with  
144 previously diagnosed MH or SUDs and those with a documented SDOH were more likely to  
145 present to the ED post-SIP. Prior studies that analyzed MH and substance use related ED visits  
146 demonstrate increased visit rates for these conditions as a primary diagnosis or chief complaint.<sup>6–</sup>  
147 <sup>8</sup> This study extends previous work by demonstrating that SIP orders significantly impacted  
148 vulnerable patients with a history of MH, SUDs and SDOH.

149 Moreover, our analysis revealed that patients with co-occurring MH/SUD and SDOH had the  
150 highest increase in ED visits following SIP orders. These patients may have faced increased  
151 difficulties in accessing care and maintaining their overall health due to the closure or reduction

152 of community-based resources<sup>9</sup> and the exacerbation of existing socioeconomic inequities during  
153 the pandemic.<sup>5</sup> Individuals with multiple disadvantages are at a significantly higher risk of  
154 premature mortality from avoidable causes than those with a single disadvantage<sup>10</sup>, highlighting  
155 the urgent need for tailored interventions that address the complex interplay of social, economic,  
156 and mental health-related factors contributing to poor health outcomes among these populations.  
157 Furthermore, patients with MH/SUDs or SDOH were less likely to be admitted to the hospital  
158 after presenting to the ED. While our study was not designed to examine the reasons behind  
159 these disparities, possible explanations include inadequate inpatient resources for patients with  
160 MH/SUD and SDOH or healthcare professional biases, as well as structural changes of  
161 healthcare resources being shunted to emergent medical care beds.

#### 162 *Low documentation of social determinants of health in patients visiting the ED*

163 Our study found that only 0.53% of ED patients had a documented Z-Code for a SDOH before  
164 and during early COVID, which is lower than other rates previously reported.<sup>3,4,11</sup> Molina et al.  
165 estimated that 1.21% of ED visits have a coded SDOH; however, our paper analyzed SDOH  
166 coding at the patient level rather than the visit level, which may explain the differences  
167 observed.<sup>12</sup> The usage of Z-Codes to identify patients with SDOH has repeatedly been shown to  
168 be underutilized and our results likely underestimate the number of patients with critical SDOH  
169 seeking care at EDs.<sup>13</sup> Future studies could consider using natural language processing models to  
170 analyze provider notes to identify patients with SDOH that do not have a documented Z-code.  
171 Identifying patients with SDOH is crucial because they are more likely to experience adverse  
172 health outcomes and increased ED utilization.<sup>14,15</sup> Coding SDOH is currently not reimbursable,  
173 which is likely reflected in its low adoption rate; however, documentation of SDOH can  
174 substantiate patient complexity and reveal trends in healthcare utilization. For instance, if  
175 hospital systems accurately track SDOH, they can identify Z-Codes associated with higher  
176 readmission rates and allocate appropriate resources to improve patient care and outcomes. In the  
177 future, Z-Codes could play a role in determining payment rates and risk adjustment, but  
178 consistent documentation of SDOH is necessary.<sup>16</sup>

#### 179 *Limitations*

180 Our results should be interpreted in the context of their limitations. First, the retrospective design  
181 of our study limits our ability to draw causal conclusions. Second, our data comes from one large  
182 integrated healthcare system, which may differ from other healthcare systems or geographic  
183 regions. Nonetheless, our study includes a large and diverse patient population from different  
184 levels of care within the state. Third, our findings may be influenced by institution-specific  
185 documentation practices that could affect SDOH coding rates and limit the generalizability of  
186 our findings. Finally, our analysis relied on patients' past medical history documentation in the  
187 EMR, which may not reflect their current diagnoses at the time of their ED visit. However, given  
188 the time constraints of the ED, we considered capturing diagnoses from past medical history the  
189 best way to represent our sample's health status.

#### 190 *Conclusion*

191 Our study highlights the impact of the COVID-19 pandemic on vulnerable patient populations  
192 with a history of MH, SUDs, and SDOH. Our findings demonstrate that these patients were more  
193 likely to present to the ED but less likely to be admitted following SIP orders, indicating a need  
194 for tailored interventions that address the complex interplay of socioeconomic and mental health-  
195 related factors contributing to poor health outcomes among these populations. The findings  
196 highlight the need for greater standardization and consistency in documenting SDOH and  
197 addressing these factors in healthcare delivery.

198 **Credit author statement: Philip Wang:** Writing – original draft preparation, methodology,  
199 conceptualization **Akhil Anand:** conceptualization, methodology, writing – review & editing,  
200 supervision **James Bena:** software, formal analysis, data curation **Shannon Morrison:** software,  
201 formal analysis, data curation **Jeremy Weleff:** conceptualization, methodology, writing – review  
202 & editing, supervision

203

## 204 **References**

205

- 206 1. Ann Priester M, Browne T, Iachini A, Clone S, DeHart D, Seay KD. Treatment Access  
207 Barriers and Disparities Among Individuals with Co-occurring Mental Health and Substance  
208 Use Disorders: An Integrative Literature Review. *J Subst Abuse Treat.* 2016;61:47-59.  
209 doi:10.1016/j.jsat.2015.09.006
- 210 2. Moulin A, Evans EJ, Xing G, Melnikow J. Substance Use, Homelessness, Mental Illness and  
211 Medicaid Coverage: A Set-up for High Emergency Department Utilization. *West J Emerg*  
212 *Med.* 2018;19(6):902-906. doi:10.5811/westjem.2018.9.38954
- 213 3. Truong HP, Luke AA, Hammond G, Wadhwa RK, Reidhead M, Joynt Maddox KE.  
214 Utilization of Social Determinants of Health ICD-10 Z-Codes Among Hospitalized Patients in  
215 the United States, 2016–2017. *Med Care.* 2020;58(12):1037-1043.  
216 doi:10.1097/MLR.0000000000001418
- 217 4. McCormack LA, Madlock-Brown C. Social Determinant of Health Documentation Trends  
218 and Their Association with Emergency Department Admissions. *AMIA Annu Symp Proc*  
219 *AMIA Symp.* 2020;2020:823-832.
- 220 5. Perry BL, Aronson B, Pescosolido BA. Pandemic precarity: COVID-19 is exposing and  
221 exacerbating inequalities in the American heartland. *Proc Natl Acad Sci.*  
222 2021;118(8):e2020685118. doi:10.1073/pnas.2020685118
- 223 6. Anderson KN, Radhakrishnan L, Lane RI, et al. **Changes and Inequities in Adult Mental**  
224 **Health–Related Emergency Department Visits During the COVID-19 Pandemic in the**  
225 **US.** *JAMA Psychiatry.* 2022;79(5):475. doi:10.1001/jamapsychiatry.2022.0164



- 226 7. Holland KM, Jones C, Vivolo-Kantor AM, et al. Trends in US Emergency Department Visits  
227 for Mental Health, Overdose, and Violence Outcomes Before and During the COVID-19  
228 Pandemic. *JAMA Psychiatry*. 2021;78(4):372. doi:10.1001/jamapsychiatry.2020.4402
- 229 8. Smalley CM, Malone DA, Meldon SW, et al. The impact of COVID-19 on suicidal ideation  
230 and alcohol presentations to emergency departments in a large healthcare system. *Am J Emerg*  
231 *Med*. 2021;41:237-238. doi:10.1016/j.ajem.2020.05.093
- 232 9. Zangani C, Ostinelli EG, Smith KA, et al. Impact of the COVID-19 Pandemic on the Global  
233 Delivery of Mental Health Services and Telemental Health: Systematic Review. *JMIR Ment*  
234 *Health*. 2022;9(8):e38600. doi:10.2196/38600
- 235 10. Tweed EJ, Leyland AH, Morrison D, Katikireddi SV. Premature mortality in people affected  
236 by co-occurring homelessness, justice involvement, opioid dependence, and psychosis: a  
237 retrospective cohort study using linked administrative data. *Lancet Public Health*.  
238 2022;7(9):e733-e743. doi:10.1016/S2468-2667(22)00159-1
- 239 11. Wray CM, Tang J, López L, Hoggatt K, Keyhani S. Association of Social Determinants of  
240 Health and Their Cumulative Impact on Hospitalization Among a National Sample of  
241 Community-Dwelling US Adults. *J Gen Intern Med*. 2022;37(8):1935-1942.  
242 doi:10.1007/s11606-021-07067-y
- 243 12. Molina MF, Pantell MS, Gottlieb LM. Social Risk Factor Documentation in Emergency  
244 Departments. *Ann Emerg Med*. 2023;81(1):38-46. doi:10.1016/j.annemergmed.2022.07.027
- 245 13. Wallace AS, Luther BL, Sisler SM, Wong B, Guo JW. Integrating social determinants of  
246 health screening and referral during routine emergency department care: evaluation of reach  
247 and implementation challenges. *Implement Sci Commun*. 2021;2(1):114. doi:10.1186/s43058-  
248 021-00212-y
- 249 14. Davis CI, Montgomery AE, Dichter ME, Taylor LD, Blosnich JR. Social determinants and  
250 emergency department utilization: Findings from the Veterans Health Administration. *Am J*  
251 *Emerg Med*. 2020;38(9):1904-1909. doi:10.1016/j.ajem.2020.05.078
- 252 15. Braveman PA, Egerter SA, Mockenhaupt RE. Broadening the FocusThe Need to Address the  
253 Social Determinants of Health. *Am J Prev Med*. 2011;40(1):S4-S18.  
254 doi:10.1016/j.amepre.2010.10.002
- 255 16. American Medical Association. Social determinants of health and medical coding: What to  
256 know. Accessed August 25, 2022. [https://www.ama-assn.org/practice-management/cpt/social-](https://www.ama-assn.org/practice-management/cpt/social-determinants-health-and-medical-coding-what-know)  
257 [determinants-health-and-medical-coding-what-know](https://www.ama-assn.org/practice-management/cpt/social-determinants-health-and-medical-coding-what-know).

258

259

260

Table 1. ED visits of categories of historical diagnoses before and after shelter-in-place orders

| Measure                                                                                          | Before shelter in<br>place<br>(5/2/2019 –<br>12/31/2019) | After shelter in<br>place<br>(5/2/2020 –<br>12/31/2020) | Relative<br>Change<br>P-value | Absolute<br>Change<br>Relative Risk | Absolute<br>Change<br>p-value |
|--------------------------------------------------------------------------------------------------|----------------------------------------------------------|---------------------------------------------------------|-------------------------------|-------------------------------------|-------------------------------|
|                                                                                                  | N (%)                                                    | N (%)                                                   |                               |                                     |                               |
| <b><i>Overall MH, SUD, and SDOH diagnoses</i></b>                                                |                                                          |                                                         |                               |                                     |                               |
| Mental Health Disorders                                                                          | 19,394 (4.1)                                             | 23,100 (5.8)                                            | <b>&lt;0.001</b>              | 1.19<br>(1.17, 1.21)                | <b>&lt;0.001</b>              |
| Substance Use Disorders                                                                          | 15,420 (3.3)                                             | 19,444 (4.9)                                            | <b>&lt;0.001</b>              | 1.26 (1.23,1.29)                    | <b>&lt;0.001</b>              |
| Mental Health or Substance Use                                                                   | 32,320 (6.8)                                             | 38,711 (9.7)                                            | <b>&lt;0.001</b>              | 1.20 (1.18,1.22)                    | <b>&lt;0.001</b>              |
| Social Determinants of Health                                                                    | 955 (0.20)                                               | 2,260 (0.57)                                            | <b>&lt;0.001</b>              | 2.37 (2.19,2.55)                    | <b>&lt;0.001</b>              |
| Behavior Health or Substance Use Disorders<br>and Social Determinants of Health                  | 200 (0.04)                                               | 662 (0.17)                                              | <b>&lt;0.001</b>              | 3.31 (2.83,3.88)                    | <b>&lt;0.001</b>              |
| <b><i>Mental Behavioral &amp; Neurodevelopmental Disorders</i></b>                               |                                                          |                                                         |                               |                                     |                               |
| Mental disorders due to known physiological<br>conditions                                        | 2,238 (0.47)                                             | 2,745 (0.69)                                            | <b>&lt;0.001</b>              | 1.23 (1.16,1.30)                    | <b>&lt;0.001</b>              |
| Schizophrenia, schizotypal, delusional, and<br>other non-mood psychotic disorders                | 3,175 (0.67)                                             | 4,464 (1.1)                                             | <b>&lt;0.001</b>              | 1.41 (1.34,1.47)                    | <b>&lt;0.001</b>              |
| Mood [affective] disorders                                                                       | 6,983 (1.5)                                              | 7,242 (1.8)                                             | <b>&lt;0.001</b>              | 1.04 (1.00,1.07)                    | <b>0.030</b>                  |
| Anxiety, dissociative, stress-related,<br>somatoform and other non-psychotic mental<br>disorders | 7,515 (1.6)                                              | 9,735 (2.4)                                             | <b>&lt;0.001</b>              | 1.30 (1.26,1.33)                    | <b>&lt;0.001</b>              |
| Behavioral syndromes associated with<br>physiological disturbances and physical factors          | 291 (0.06)                                               | 304 (0.08)                                              | <b>0.008</b>                  | 1.04 (0.89,1.23)                    | 0.59                          |
| Disorders of adult personality and behavior                                                      | 411 (0.09)                                               | 581 (0.15)                                              | <b>&lt;0.001</b>              | 1.41 (1.25,1.60)                    | <b>&lt;0.001</b>              |



Table 1. ED visits of categories of historical diagnoses before and after shelter-in-place orders

| Measure                                                                      | Before shelter in<br>place<br>(5/2/2019 –<br>12/31/2019) | After shelter in<br>place<br>(5/2/2020 –<br>12/31/2020) | Relative<br>Change<br>P-value | Absolute<br>Change<br>Relative Risk | Absolute<br>Change<br>p-value |
|------------------------------------------------------------------------------|----------------------------------------------------------|---------------------------------------------------------|-------------------------------|-------------------------------------|-------------------------------|
|                                                                              | N (%)                                                    | N (%)                                                   |                               |                                     |                               |
| Intellectual disabilities                                                    | 153 (0.03)                                               | 207 (0.05)                                              | <0.001                        | 1.35 (1.10,1.67)                    | 0.005                         |
| Pervasive and specific developmental disorders                               | 233 (0.05)                                               | 402 (0.10)                                              | <0.001                        | 1.73 (1.47,2.03)                    | <0.001                        |
| Behavioral and emotional disorders with onset usually occurring in childhood | 552 (0.12)                                               | 768 (0.19)                                              | <0.001                        | 1.39 (1.25,1.55)                    | <0.001                        |
| <b><i>Substance Use Disorders</i></b>                                        |                                                          |                                                         |                               |                                     |                               |
| Alcohol related disorders                                                    | 7,247 (1.5)                                              | 8,341 (2.1)                                             | <0.001                        | 1.15 (1.12,1.19)                    | <0.001                        |
| Opioid related disorders                                                     | 1,074 (0.23)                                             | 1,239 (0.31)                                            | <0.001                        | 1.15 (1.06,1.25)                    | <0.001                        |
| Cannabis related disorders                                                   | 1,263 (0.27)                                             | 2,362 (0.59)                                            | <0.001                        | 1.87 (1.75,2.00)                    | <0.001                        |
| Sedative, hypnotic, or anxiolytic related disorders                          | 175 (0.04)                                               | 217 (0.05)                                              | <0.001                        | 1.24 (1.02,1.51)                    | 0.034                         |
| Cocaine related disorders                                                    | 1,243 (0.26)                                             | 1,267 (0.32)                                            | <0.001                        | 1.02 (0.94,1.10)                    | 0.63                          |
| Other stimulant related disorders                                            | 416 (0.09)                                               | 561 (0.14)                                              | <0.001                        | 1.35 (1.19,1.53)                    | <0.001                        |
| Hallucinogen related disorders                                               | 317 (0.07)                                               | 330 (0.08)                                              | 0.006                         | 1.04 (0.89,1.21)                    | 0.61                          |
| Nicotine dependence                                                          | 2,940 (0.62)                                             | 5,219 (1.3)                                             | <0.001                        | 1.78 (1.70,1.86)                    | <0.001                        |
| Other psychoactive substance related disorders                               | 2,788 (0.59)                                             | 3,074 (0.77)                                            | <0.001                        | 1.10 (1.05,1.16)                    | <0.001                        |
| <b><i>Social Determinants of Health</i></b>                                  |                                                          |                                                         |                               |                                     |                               |
| Problems related to education and literacy                                   | 9 (0.00)                                                 | 6 (0.00)                                                | 0.66                          | 0.67 (0.24,1.87)                    | 0.44                          |
| Problems related to employment and unemployment                              | 15 (0.00)                                                | 24 (0.01)                                               | 0.046                         | 1.60 (0.84,3.05)                    | 0.15                          |
| Problems related to housing and economic circumstances                       | 420 (0.09)                                               | 1,051 (0.26)                                            | <0.001                        | 2.50 (2.23,2.80)                    | <0.001                        |
| Problems related to social environment                                       | 60 (0.01)                                                | 121 (0.03)                                              | <0.001                        | 2.02 (1.48,2.75)                    | <0.001                        |

Table 1. ED visits of categories of historical diagnoses before and after shelter-in-place orders

| Measure                                                                         | Before shelter in place<br>(5/2/2019 – 12/31/2019) | After shelter in place<br>(5/2/2020 – 12/31/2020) | Relative Change<br>P-value | Absolute Change<br>Relative Risk | Absolute Change<br>p-value |
|---------------------------------------------------------------------------------|----------------------------------------------------|---------------------------------------------------|----------------------------|----------------------------------|----------------------------|
|                                                                                 | N (%)                                              | N (%)                                             |                            |                                  |                            |
| Other problems related to primary support group, including family circumstances | 310 (0.07)                                         | 897 (0.23)                                        | <0.001                     | 2.89 (2.54,3.29)                 | <0.001                     |
| Problems related to other psychosocial circumstances                            | 112 (0.02)                                         | 157 (0.04)                                        | <0.001                     | 1.40 (1.10,1.79)                 | 0.006                      |
| <b><i>Disease Systems</i></b>                                                   |                                                    |                                                   |                            |                                  |                            |
| Diseases of the Nervous System                                                  | 20,831 (4.4)                                       | 21,560 (5.4)                                      | <0.001                     | 1.03 (1.02,1.05)                 | <0.001                     |
| Diseases of the Circulatory System                                              | 50,527 (10.7)                                      | 59,105 (14.8)                                     | <0.001                     | 1.17 (1.16,1.18)                 | <0.001                     |
| Diseases of the Respiratory System                                              | 63,045 (13.3)                                      | 44,616 (11.2)                                     | <0.001                     | 0.71 (0.70,0.72)                 | <0.001                     |
| Diseases of the Digestive System                                                | 42,809 (9.0)                                       | 42,061 (10.6)                                     | <0.001                     | 0.98 (0.97,1.00)                 | 0.010                      |
| Diseases of the Skin                                                            | 22,499 (4.7)                                       | 19,665 (4.9)                                      | <0.001                     | 0.87 (0.86,0.89)                 | <0.001                     |
| Diseases of the Musculoskeletal System                                          | 57,844 (12.2)                                      | 63,968 (16.1)                                     | <0.001                     | 1.11 (1.09,1.12)                 | <0.001                     |
| Diseases of the Genitourinary System                                            | 57,574 (12.1)                                      | 58,011 (14.6)                                     | <0.001                     | 1.01 (1.00,1.02)                 | 0.20                       |
| <b><i>Suicide/Self-harm</i></b>                                                 |                                                    |                                                   |                            |                                  |                            |
| Suicidal ideation                                                               | 2,140 (0.45)                                       | 2,366 (0.59)                                      | <0.001                     | 1.11 (1.04,1.17)                 | <0.001                     |
| Suicide attempt and self-inflicted harm                                         | 4,153 (0.88)                                       | 4,070 (1.02)                                      | <0.001                     | 0.98 (0.94,1.02)                 | 0.36                       |
| Opioid specific overdose                                                        | 473 (0.10)                                         | 329 (0.08)                                        | 0.009                      | 0.70 (0.60,0.80)                 | <0.001                     |
| Transgender Status                                                              | 11 (0.00)                                          | 35 (0.01)                                         | <0.001                     | 3.18 (1.62,6.26)                 | <0.001                     |
| Severe Presentation                                                             | 6,133 (1.3)                                        | 6,277 (1.6)                                       | <0.001                     | 1.02 (0.99,1.06)                 | 0.20                       |

Table 2. Admission rates of categories of historical diagnoses before and after shelter-in-place orders

| Measure                                                                                    | Before shelter in place<br>(5/2/2019 – 12/31/2019) |                     | After shelter in place<br>(5/2/2020 – 12/31/2020) |                     | Odds Ratio        | p-value |
|--------------------------------------------------------------------------------------------|----------------------------------------------------|---------------------|---------------------------------------------------|---------------------|-------------------|---------|
|                                                                                            | Encounters<br>(N)                                  | Admissions<br>N (%) | Encounters<br>N                                   | Admissions<br>N (%) |                   |         |
| <i>Overall MH, SUD, and SDOH diagnoses</i>                                                 |                                                    |                     |                                                   |                     |                   |         |
| Mental Health Disorders                                                                    | 19,374                                             | 7,244 (37.4)        | 23,087                                            | 8,140 (35.3)        | 0.91 (0.88, 0.95) | <0.001  |
| Substance Use Disorders                                                                    | 15,398                                             | 5,653 (36.7)        | 19,425                                            | 6,453 (33.2)        | 0.86 (0.82,0.90)  | <0.001  |
| Mental Health or Substance Use Disorders                                                   | 32,282                                             | 11,851 (36.7)       | 38,680                                            | 13,174 (34.1)       | 0.89 (0.86,0.92)  | <0.001  |
| Social Determinants of Health                                                              | 955                                                | 155 (16.2)          | 2,259                                             | 260 (11.5)          | 0.67 (0.54,0.83)  | <0.001  |
| Behavior Health or Substance Use and Social and Economic Disadvantage                      | 200                                                | 32 (16.0)           | 662                                               | 73 (11.0)           | 0.65 (0.42,1.02)  | 0.061   |
| <i>Mental Behavioral &amp; Neurodevelopmental Disorders</i>                                |                                                    |                     |                                                   |                     |                   |         |
| Mental disorders due to known physiological conditions                                     | 2,235                                              | 1,288 (57.6)        | 2,745                                             | 1,610 (58.7)        | 1.04 (0.93,1.17)  | 0.47    |
| Schizophrenia, schizotypal, delusional, and other non-mood psychotic disorders             | 3,171                                              | 1,152 (36.3)        | 4,462                                             | 1,481 (33.2)        | 0.87 (0.79,0.96)  | 0.004   |
| Mood [affective] disorders                                                                 | 6,972                                              | 3,064 (43.9)        | 7,236                                             | 3,212 (44.4)        | 1.02 (0.95,1.09)  | 0.60    |
| Anxiety, dissociative, stress-related, somatoform and other non-psychotic mental disorders | 7,511                                              | 2,207 (29.4)        | 9,726                                             | 2,501 (25.7)        | 0.83 (0.78,0.89)  | <0.001  |
| Behavioral syndromes associated with physiological disturbances and physical factors       | 291                                                | 193 (66.3)          | 304                                               | 185 (60.9)          | 0.79 (0.56,1.10)  | 0.17    |
| Disorders of adult personality and behavior                                                | 411                                                | 139 (33.8)          | 580                                               | 172 (29.7)          | 0.82 (0.63,1.08)  | 0.16    |
| Intellectual disabilities                                                                  | 153                                                | 74 (48.4)           | 207                                               | 82 (39.6)           | 0.70 (0.46,1.07)  | 0.098   |
| Pervasive and specific developmental disorders                                             | 233                                                | 98 (42.1)           | 402                                               | 121 (30.1)          | 0.59 (0.42,0.83)  | 0.002   |
| Behavioral and emotional disorders with onset usually occurring in childhood               | 552                                                | 202 (36.6)          | 768                                               | 207 (27.0)          | 0.64 (0.51,0.81)  | <0.001  |
| <i>Substance Use Disorders</i>                                                             |                                                    |                     |                                                   |                     |                   |         |

**Table 2. Admission rates of categories of historical diagnoses before and after shelter-in-place orders**

| Measure                                                                         | Before shelter in place<br>(5/2/2019 – 12/31/2019) |                     | After shelter in place<br>(5/2/2020 – 12/31/2020) |                     | Odds Ratio        | p-value          |
|---------------------------------------------------------------------------------|----------------------------------------------------|---------------------|---------------------------------------------------|---------------------|-------------------|------------------|
|                                                                                 | Encounters<br>(N)                                  | Admissions<br>N (%) | Encounters<br>N                                   | Admissions<br>N (%) |                   |                  |
| Alcohol related disorders                                                       | 7,237                                              | 2,630 (36.3)        | 8,336                                             | 3,098 (37.2)        | 1.04 (0.97,1.11)  | 0.29             |
| Opioid related disorders                                                        | 1,074                                              | 428 (39.9)          | 1,238                                             | 461 (37.2)          | 0.90 (0.76,1.06)  | 0.20             |
| Cannabis related disorders                                                      | 1,261                                              | 319 (25.3)          | 2,361                                             | 587 (24.9)          | 0.98 (0.83,1.14)  | 0.77             |
| Sedative, hypnotic, or anxiolytic related disorders                             | 175                                                | 85 (48.6)           | 217                                               | 95 (43.8)           | 0.82 (0.55,1.23)  | 0.34             |
| Cocaine related disorders                                                       | 1,238                                              | 462 (37.3)          | 1,267                                             | 507 (40.0)          | 1.12 (0.95,1.32)  | 0.17             |
| Other stimulant related disorders                                               | 416                                                | 97 (23.3)           | 558                                               | 138 (24.7)          | 1.08 (0.80,1.46)  | 0.61             |
| Hallucinogen related disorders                                                  | 317                                                | 30 (9.5)            | 330                                               | 43 (13.0)           | 1.43 (0.87,2.35)  | 0.15             |
| Nicotine dependence                                                             | 2,933                                              | 1,612 (55.0)        | 5,212                                             | 1,925 (36.9)        | 0.48 (0.44,0.53)  | <b>&lt;0.001</b> |
| Other psychoactive substance related disorders                                  | 2,785                                              | 855 (30.7)          | 3,071                                             | 942 (30.7)          | 1.00 (0.89,1.12)  | 0.98             |
| <b><i>Social Determinants of Health</i></b>                                     |                                                    |                     |                                                   |                     |                   |                  |
| Problems related to education and literacy                                      | 9                                                  | 5 (55.6)            | 6                                                 | 2 (33.3)            | 0.40 (0.05,3.42)  | 0.40             |
| Problems related to employment and unemployment                                 | 15                                                 | 1 (6.7)             | 24                                                | 3 (12.5)            | 2.00 (0.19,21.23) | 0.57             |
| Problems related to housing and economic circumstances                          | 420                                                | 52 (12.4)           | 1,051                                             | 119 (11.3)          | 0.90 (0.64,1.28)  | 0.57             |
| Problems related to social environment                                          | 60                                                 | 36 (60.0)           | 120                                               | 69 (57.5)           | 0.90 (0.48,1.69)  | 0.75             |
| Other problems related to primary support group, including family circumstances | 310                                                | 18 (5.8)            | 897                                               | 25 (2.8)            | 0.47 (0.25,0.86)  | <b>0.016</b>     |
| Problems related to other psychosocial circumstances                            | 112                                                | 46 (41.1)           | 157                                               | 46 (29.3)           | 0.59 (0.36,0.99)  | <b>0.046</b>     |
| <b><i>Disease Systems</i></b>                                                   |                                                    |                     |                                                   |                     |                   |                  |
| Diseases of the Nervous System                                                  | 20,798                                             | 11,024 (53.0)       | 21,531                                            | 11,529 (53.5)       | 1.02 (0.98,1.06)  | 0.26             |
| Diseases of the Circulatory System                                              | 50,424                                             | 32,519 (64.5)       | 59,003                                            | 34,179 (57.9)       | 0.76 (0.74,0.78)  | <b>&lt;0.001</b> |
| Diseases of the Respiratory System                                              | 63,004                                             | 19,574 (31.1)       | 44,572                                            | 17,801 (39.9)       | 1.48 (1.44,1.51)  | <b>&lt;0.001</b> |
| Diseases of the Digestive System                                                | 42,747                                             | 16,633 (38.9)       | 42,017                                            | 17,063 (40.6)       | 1.07 (1.04,1.10)  | <b>&lt;0.001</b> |

Table 2. Admission rates of categories of historical diagnoses before and after shelter-in-place orders

| Measure                                 | Before shelter in place<br>(5/2/2019 – 12/31/2019) |                     | After shelter in place<br>(5/2/2020 – 12/31/2020) |                     | Odds Ratio       | p-value          |
|-----------------------------------------|----------------------------------------------------|---------------------|---------------------------------------------------|---------------------|------------------|------------------|
|                                         | Encounters<br>(N)                                  | Admissions<br>N (%) | Encounters<br>N                                   | Admissions<br>N (%) |                  |                  |
| Diseases of the Skin                    | 22,494                                             | 5,238 (23.3)        | 19,655                                            | 5,292 (26.9)        | 1.21 (1.16,1.27) | <b>&lt;0.001</b> |
| Diseases of the Musculoskeletal System  | 57,817                                             | 9,110 (15.8)        | 63,946                                            | 9,818 (15.4)        | 0.97 (0.94,1.00) | 0.053            |
| Diseases of the Genitourinary System    | 57,529                                             | 23,281 (40.5)       | 57,952                                            | 24,565 (42.4)       | 1.08 (1.06,1.11) | <b>&lt;0.001</b> |
| <b><i>Suicide/Self-harm</i></b>         |                                                    |                     |                                                   |                     |                  |                  |
| Suicidal ideation                       | 2,139                                              | 582 (27.2)          | 2,366                                             | 824 (34.8)          | 1.43 (1.26,1.62) | <b>&lt;0.001</b> |
| Suicide attempt and self-inflicted harm | 4,150                                              | 908 (21.9)          | 4,065                                             | 852 (21.0)          | 0.95 (0.85,1.05) | 0.31             |
| Opioid specific overdose                | 471                                                | 47 (10.0)           | 329                                               | 38 (11.6)           | 1.18 (0.75,1.85) | 0.48             |
| Transgender Status                      | 11                                                 | 5 (45.5)            | 34                                                | 13 (38.2)           | 0.74 (0.19,2.93) | 0.67             |
| Severe Presentation                     | 6,129                                              | 1,417 (23.1)        | 6,272                                             | 1,612 (25.7)        | 1.15 (1.06,1.25) | <b>&lt;0.001</b> |

**Supplemental Table 1: Counts and frequencies of patients with historical diagnoses of interest**

| <b>Diagnosis</b>                                                                                 | <b>Total<br/>(N=487,028)</b> |
|--------------------------------------------------------------------------------------------------|------------------------------|
| <b>Overall MH, SUD, and SDOH diagnoses</b>                                                       |                              |
| Mental Health Disorders                                                                          | 49,742 (10.2)                |
| Substance Use Disorders                                                                          | 24,549 (5.0)                 |
| Social Determinants of Health,                                                                   | 2,572 (0.53)                 |
| <b>Mental Behavioral &amp; Neurodevelopmental Disorders</b>                                      |                              |
| Mental disorders due to known physiological conditions,                                          | 4,134 (0.85)                 |
| Schizophrenia, schizotypal, delusional, and other non-mood psychotic disorders,                  | 4,212 (0.86)                 |
| Mood [effective] disorders,                                                                      | 11,084 (2.3)                 |
| Anxiety, dissociative, stress-related, somatoform and other non-psychotic mental disorders,      | 14,208 (2.9)                 |
| Behavioral syndromes associated with physiological disturbances and physical factors,            | 541 (0.11)                   |
| Disorders of adult personality and behavior,                                                     | 702 (0.14)                   |
| Intellectual disabilities,                                                                       | 250 (0.05)                   |
| Pervasive and specific developmental disorders,                                                  | 481 (0.10)                   |
| Behavioral and emotional disorders with onset usually occurring in childhood,                    | 1,152 (0.24)                 |
| <b>Substance Use Disorders</b>                                                                   |                              |
| Alcohol related disorders,                                                                       | 10,052 (2.1)                 |
| Opioid related disorders,                                                                        | 1,897 (0.39)                 |
| Cannabis related disorders,                                                                      | 3,277 (0.67)                 |
| Sedative, hypnotic, or anxiolytic related disorders,                                             | 379 (0.08)                   |
| Other stimulant related disorders,                                                               | 873 (0.18)                   |
| Hallucinogen related disorders,                                                                  | 474 (0.10)                   |
| Nicotine dependence,                                                                             | 7,699 (1.6)                  |
| Other psychoactive substance related disorders,                                                  | 4,678 (0.96)                 |
| <b>Social Determinants of Health</b>                                                             |                              |
| Problems related to education and literacy,                                                      | 15 (0.00)                    |
| Problems related to employment and unemployment,                                                 | 39 (0.01)                    |
| Occupational exposure to risk factors,                                                           | 45 (0.01)                    |
| Problems related to housing and economic circumstances,                                          | 802 (0.16)                   |
| Problems related to social environment,                                                          | 177 (0.04)                   |
| Problems related to upbringing,                                                                  | 12 (0.00)                    |
| Other problems related to primary support group, including family circumstances                  | 1,157 (0.24)                 |
| Problems related to certain psychosocial circumstances,                                          | 4 (0.00)                     |
| Problems related to other psychosocial circumstances,                                            | 263 (0.05)                   |
| <b>Disease Systems</b>                                                                           |                              |
| Neoplasms,                                                                                       | 13,424 (2.8)                 |
| Diseases of the blood and blood-forming organs and certain disorders involving immune mechanism, | 31,867 (6.5)                 |
| Endocrine, nutritional and metabolic diseases,                                                   | 82,877 (17.0)                |
| Diseases of the Nervous System,                                                                  | 35,789 (7.3)                 |
| Diseases of the eye and adnexa,                                                                  | 14,523 (3.0)                 |



**Supplemental Table 1: Counts and frequencies of patients with historical diagnoses of interest**

| <b>Diagnosis</b>                                                                         | <b>Total<br/>(N=487,028)</b> |
|------------------------------------------------------------------------------------------|------------------------------|
| Diseases of the ear and mastoid process,                                                 | 14,830 (3.0)                 |
| Diseases of the Circulatory System,                                                      | 80,081 (16.4)                |
| Diseases of the Respiratory System,                                                      | 85,219 (17.5)                |
| Diseases of the Digestive System,                                                        | 68,523 (14.1)                |
| Diseases of the Skin and subcutaneous tissue,                                            | 35,984 (7.4)                 |
| Diseases of the musculoskeletal system and connective tissue,                            | 98,638 (20.3)                |
| Diseases of the genitourinary system,                                                    | 84,660 (17.4)                |
| Pregnancy, childbirth and the puerperium,                                                | 676 (0.14)                   |
| Certain conditions originating in the perinatal period,                                  | 1,002 (0.21)                 |
| Congenital malformations, deformations and chromosomal abnormalities,                    | 2,155 (0.44)                 |
| Symptoms, signs and abnormal clinical and laboratory findings, not elsewhere classified, | 267,956 (55.0)               |
| Injury, poisoning and certain other consequences of external causes,                     | 155,944 (32.0)               |
| Codes for special purposes,                                                              | 11,244 (2.3)                 |
| External causes of morbidity,                                                            | 21,455 (4.4)                 |
| Factors influencing health status and contact with health services,                      | 101,058 (20.7)               |
| <b><i>Suicide/Self-harm</i></b>                                                          |                              |
| Suicidal ideation,                                                                       | 3,956 (0.81)                 |
| Suicide attempt and self-inflicted harm,                                                 | 7,879 (1.6)                  |
| Suicide death by underlying cause of death,                                              | 48 (0.01)                    |
| Suicide deaths by method,                                                                | 48 (0.01)                    |
| Overdoses,                                                                               | 0 (0.00)                     |
| Opioid specific overdose,                                                                | 732 (0.15)                   |
| Transgender Status,                                                                      | 46 (0.01)                    |
| Severe Presentation,                                                                     | 11,244 (2.3)                 |
| Behavior Health/Substance Abuse and Social and Economic Disadvantage,                    | 525 (0.11)                   |

\*Data not available for all subjects. Missing values: Other problems related to primary support group, including family circumstances = 485,871. Statistics presented as N (column %).

**Supplemental Table 2. Demographics of patients with and without social determinants of health**

| <b>Factor</b>   | <b>Total<br/>(N=487,028)</b> | <b>No Coded Social Determinant of Health<br/>(N=484,456)</b> | <b>Coded Determinants of Health<br/>(N=2,572)</b> | <b>p-value</b>               |
|-----------------|------------------------------|--------------------------------------------------------------|---------------------------------------------------|------------------------------|
| Patient Race, * |                              |                                                              |                                                   | <b>&lt;0.001<sup>c</sup></b> |

**Supplemental Table 2. Demographics of patients with and without social determinants of health**

| Factor                                    | Total<br>(N=487,028) | No Coded Social Determinant of Health<br>(N=484,456) | Coded Determinants of Health<br>(N=2,572) | p-value                      |
|-------------------------------------------|----------------------|------------------------------------------------------|-------------------------------------------|------------------------------|
| AMERICAN INDIAN/ALASKA NATIVE             | 611 (0.13)           | 609 (0.13)                                           | 2 (0.08)                                  |                              |
| ASIAN                                     | 4,549 (0.97)         | 4,524 (0.97)                                         | 25 (1.04)                                 |                              |
| BLACK                                     | 132,895 (28.3)       | 131,905 (28.3)                                       | 990 (41.3)                                |                              |
| MULTIRACIAL/MULTICULTURAL                 | 22,721 (4.8)         | 22,485 (4.8)                                         | 236 (9.8)                                 |                              |
| OTHER                                     | 1,374 (0.29)         | 1,369 (0.29)                                         | 5 (0.21)                                  |                              |
| WHITE                                     | 306,850 (65.4)       | 305,708 (65.5)                                       | 1,142 (47.6)                              |                              |
| Patient Gender, *                         |                      |                                                      |                                           | <b>&lt;0.001<sup>c</sup></b> |
| FEMALE                                    | 262,222 (53.8)       | 261,028 (53.9)                                       | 1,194 (46.4)                              |                              |
| MALE                                      | 224,754 (46.2)       | 223,376 (46.1)                                       | 1,378 (53.6)                              |                              |
| NONBINARY                                 | 18 (0.00)            | 18 (0.00)                                            | 0 (0.00)                                  |                              |
| Ethnic Group Name, *                      |                      |                                                      |                                           | <b>&lt;0.001<sup>c</sup></b> |
| African American                          | 132,494 (27.4)       | 131,505 (27.3)                                       | 989 (38.8)                                |                              |
| Asian/Pacific Islander                    | 4,597 (0.95)         | 4,571 (0.95)                                         | 26 (1.02)                                 |                              |
| Caucasian                                 | 291,401 (60.3)       | 290,287 (60.4)                                       | 1,114 (43.7)                              |                              |
| Hispanic                                  | 36,939 (7.6)         | 36,717 (7.6)                                         | 222 (8.7)                                 |                              |
| Multi-Racial                              | 12,031 (2.5)         | 11,895 (2.5)                                         | 136 (5.3)                                 |                              |
| Native American                           | 609 (0.13)           | 607 (0.13)                                           | 2 (0.08)                                  |                              |
| Other                                     | 5,465 (1.1)          | 5,403 (1.1)                                          | 62 (2.4)                                  |                              |
| Hispanic Race, *                          |                      |                                                      |                                           | <b>0.027<sup>c</sup></b>     |
| Hispanic                                  | 36,939 (7.8)         | 36,717 (7.8)                                         | 222 (8.9)                                 |                              |
| Not Hispanic                              | 438,901 (92.2)       | 436,641 (92.2)                                       | 2,260 (91.1)                              |                              |
| Current Age, mean ± sd*                   | 46.0 ± 24.0          | 46.1 ± 23.9                                          | 28.7 ± 26.0                               | <b>&lt;0.001<sup>a</sup></b> |
| Age at Admission, mean ± sd*              | 44.9 ± 24.0          | 45.0 ± 23.9                                          | 27.6 ± 25.8                               | <b>&lt;0.001<sup>a</sup></b> |
| ED Disposition - Admit/Transfer, *        | 111,010 (22.8)       | 110,491 (22.8)                                       | 519 (20.2)                                | <b>0.001<sup>c</sup></b>     |
| Insurance,                                |                      |                                                      |                                           | <b>&lt;0.001<sup>c</sup></b> |
| Government (Medicare/Medicaid) + Self-Pay | 151,708 (31.1)       | 150,620 (31.1)                                       | 1,088 (42.3)                              |                              |
| Private + Other inc. CCHS                 | 335,320 (68.9)       | 333,836 (68.9)                                       | 1,484 (57.7)                              |                              |

\*Data not available for all subjects. Missing values: Patient Race = 18,028; Patient Gender = 34; Ethnic Group Name = 3,492; Hispanic Race = 11,188; Current Age = 78; Age at Admission = 78; ED Disposition - Admit/Transfer = 599.

Statistics presented as Mean ± SD, N (column %).

p-values: a=Satterthwaite t-test, c=Pearson's chi-square test.
